# Supplementary material
Source: PubMed Central journal article supplement (PMC2732976)

## FIGURE LEGENDS

**Web Figure 1.** Map of participants, PM<sub>10</sub> monitors & examination sites, The Environmental Epidemiology of Arrhythmogenesis, 1993–2004. From 25 to 145 sampled participants were followed at each examination site. Participant addresses were a median of 8 km and a mean of 12 (standard deviation, 14) km away from the nearest monitor. PM<sub>10</sub>, particulate matter of <10 μm in diameter.

**Web Figure 2.** Scatterplots of lag<sub>0-1</sub> PM<sub>10</sub> concentration, temperature, dew point and barometric pressure by examination year, with kernel-smoothed moving averages, The Environmental Epidemiology of Arrhythmogenesis, 1993–2004. At Examination 1 (grey), 2 (blue) and 3 (black), mean (SE) PM<sub>10</sub> was 28 (0.2), 27 (0.2) & 27 (0.3) μg/m<sup>3</sup>, respectively. The corresponding mean temperature, dew point and barometric pressure were 14°C (57°F), 8°C (46°F) and 102 kPa (765 mm Hg) (at each examination). The scatterplot of PM<sub>10</sub> excludes two outlying values: 126 and 123 μg/m<sup>3</sup>.

Web Figure 1

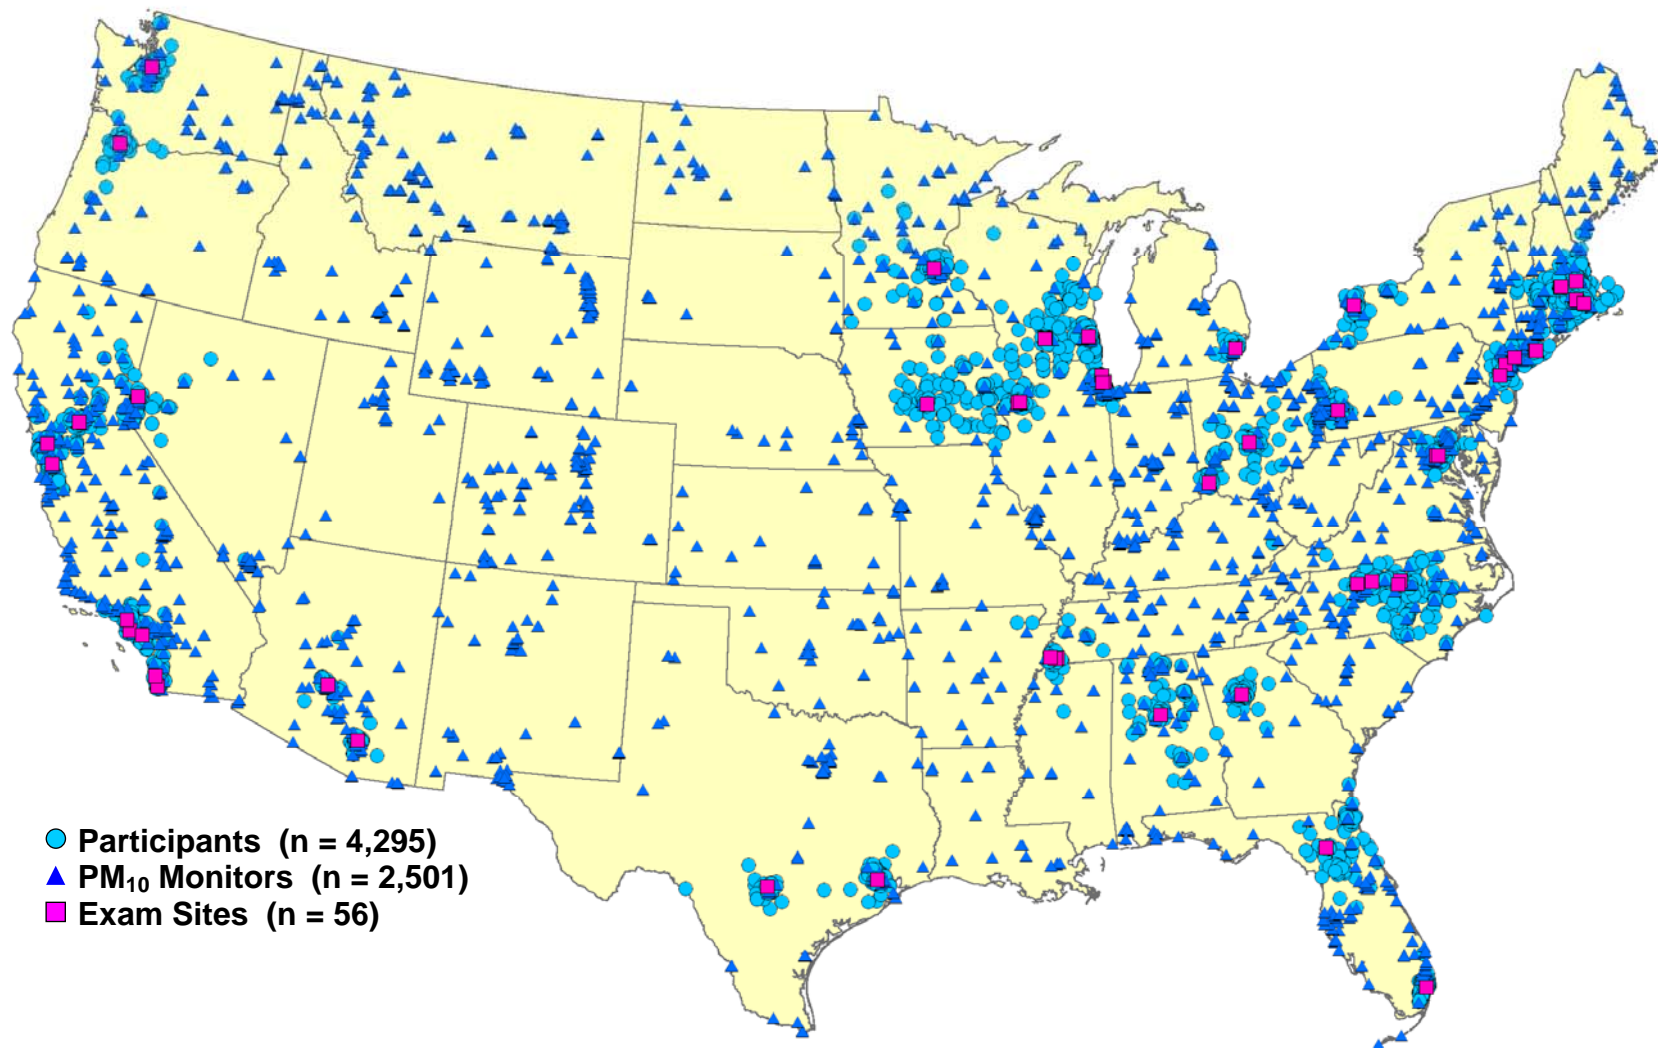

Web Figure 2

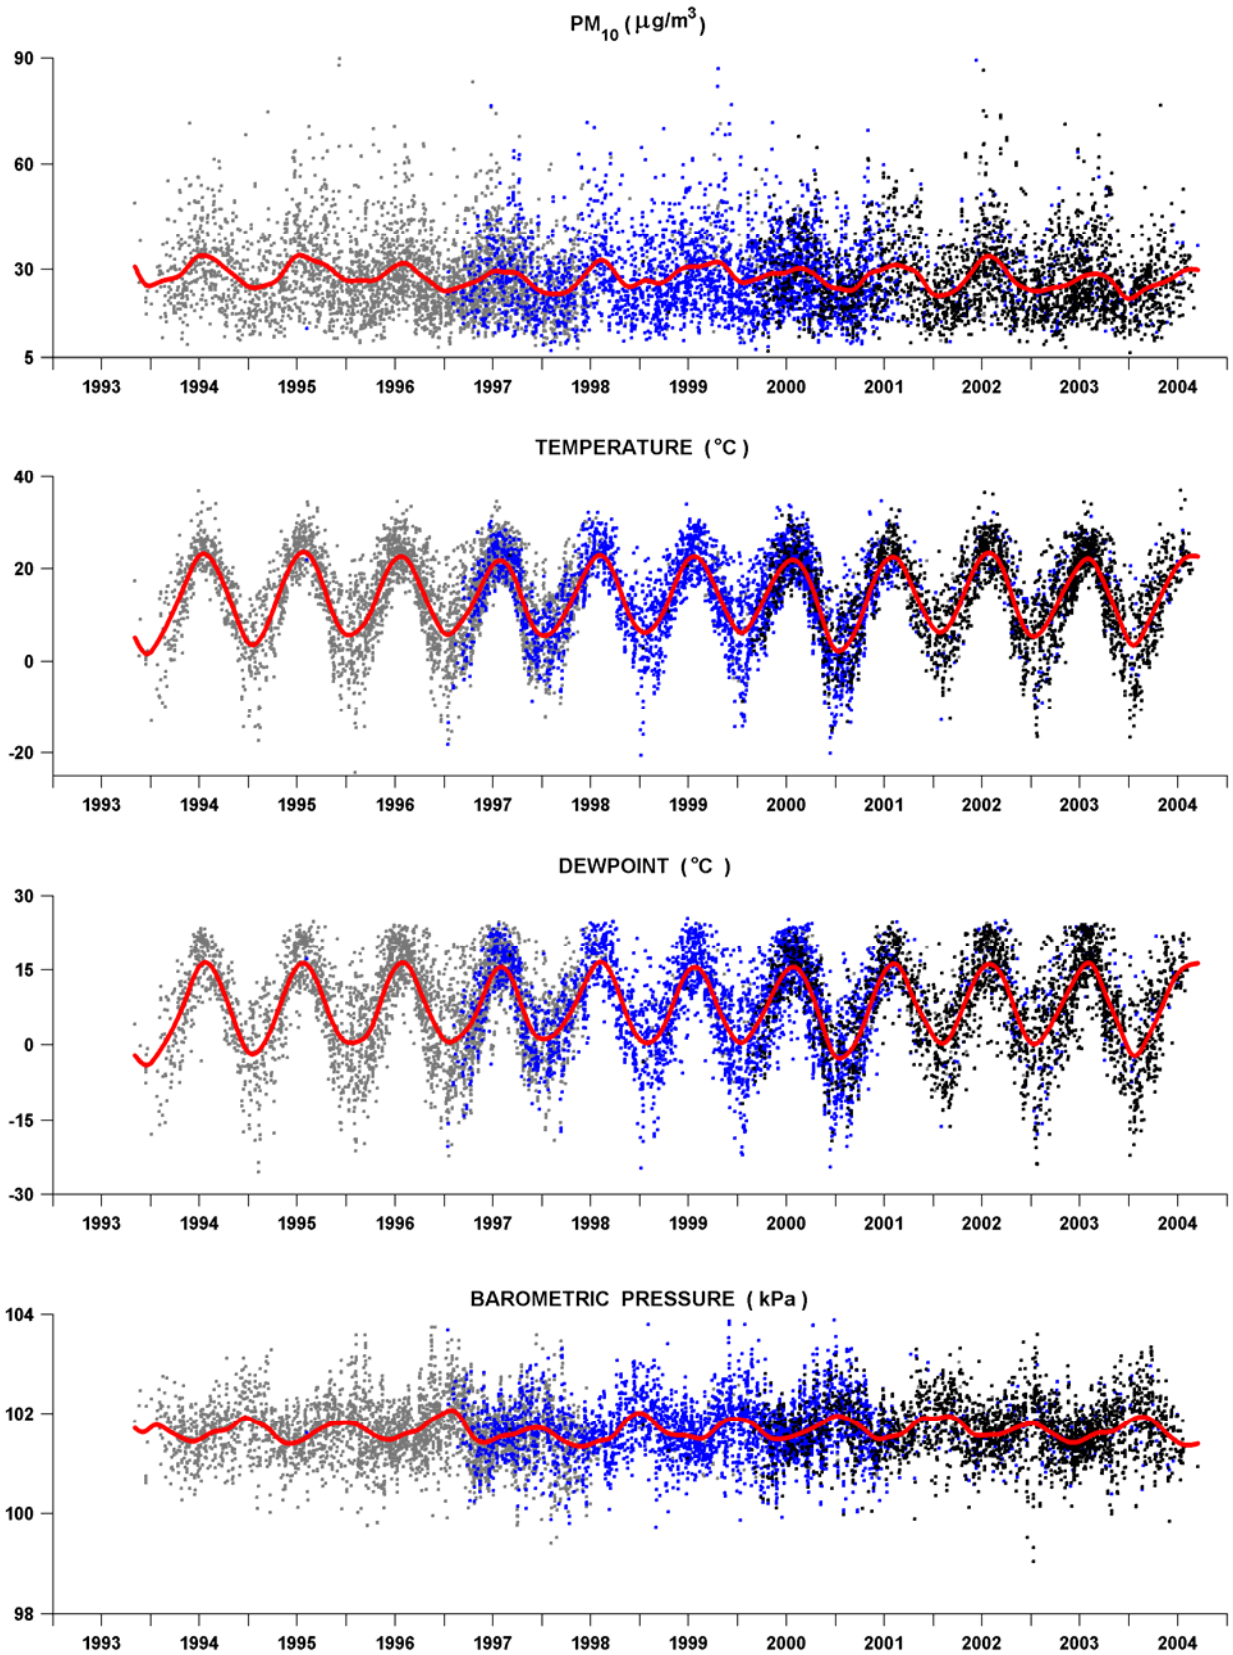

Supplement: kwn400_1.pdf [file kwn400_1.pdf]
